# Supplementary material for: Thermoelectric–photoelectric composite nanocables induced a larger efficiency in dye-sensitized solar cells
Source: Royal Society of Chemistry journal article supplement (doi:10.1039/c6ta02755e), 2016-01-01
Supplement: c6ta02755e1.pdf [file c6ta02755e1.pdf]

## Supporting materials for

# Thermoelectric-Photoelectric Composite Nanocables Induced Larger Efficiency of Dye-Sensitized Solar Cells

Hongcai He,<sup>1</sup> Chuanbo Zhang,<sup>1</sup> Tao Liu,<sup>1</sup> Yonghai Cao,<sup>2</sup> Ning Wang<sup>1,\*</sup> and Zhanhu Guo<sup>2,\*</sup>

<sup>1</sup>State Key Laboratory of Electronic Thin Films and Integrated Devices, University of Electronic  
Science and Technology of China, Chengdu 610054, China

<sup>2</sup>Integrated Composites Laboratory (ICL), Department of Chemical & Biomolecular Engineering,  
University of Tennessee, Knoxville, TN 37996, USA

## 1. Seebeck coefficient and resistivity of NaCo<sub>2</sub>O<sub>4</sub>, TiO<sub>2</sub> and TiO<sub>2</sub>-NaCo<sub>2</sub>O<sub>4</sub> composite materials

NaCo<sub>2</sub>O<sub>4</sub> powder, TiO<sub>2</sub> powder and TiO<sub>2</sub>-NaCo<sub>2</sub>O<sub>4</sub> composite nanocables were pressed and sintered at 900 °C for 4 h in air. The obtained samples were cut into bars of 2×2×11 mm<sup>3</sup> for Seebeck coefficient (S) and electrical resistivity (ρ) measurements using a commercial system (ZEM-3, ADVANCE RIKO, Inc., Japan). Fig. S1 shows temperature dependence of resistivity (ρ) and Seebeck coefficient (S) of NaCo<sub>2</sub>O<sub>4</sub>, TiO<sub>2</sub> and TiO<sub>2</sub>-NaCo<sub>2</sub>O<sub>4</sub> composite materials. NaCo<sub>2</sub>O<sub>4</sub> shows a low resistivity of about 1 mΩ cm (Fig. S1A(a)) and a positive Seebeck coefficient of about 108 μV K<sup>-1</sup> (Fig. S1B(a)) at room temperature, implying that NaCo<sub>2</sub>O<sub>4</sub> is a good p-type thermoelectric oxide. TiO<sub>2</sub> shows a high negative Seebeck coefficient of about -350 μV K<sup>-1</sup> (Fig. S1B(b)) at room temperature to indicate that it is an n-type thermoelectric oxide, but its high resistivity of about 320 mΩ cm (Fig. S1A(b)) at room temperature weakens its thermoelectric performance. As a result, the temperature gradient effect in the DSSC with pure TiO<sub>2</sub> photoanode is suppressed so that there is no obvious difference among their *J-V* characteristics under different ΔT, Fig. 5C and 5D. Since the mass ratio of NaCo<sub>2</sub>O<sub>4</sub> and TiO<sub>2</sub> in CNCs is about 1:4, that is, the mass percentage of NaCo<sub>2</sub>O<sub>4</sub> in CNCs is only about 20%, the TiO<sub>2</sub>-NaCo<sub>2</sub>O<sub>4</sub> composite material exhibits similar Seebeck coefficient and resistivity to TiO<sub>2</sub>, but its values of both Seebeck coefficient and resistivity are smaller than those of TiO<sub>2</sub>, (Fig. S1B(c) and S1A(c)).

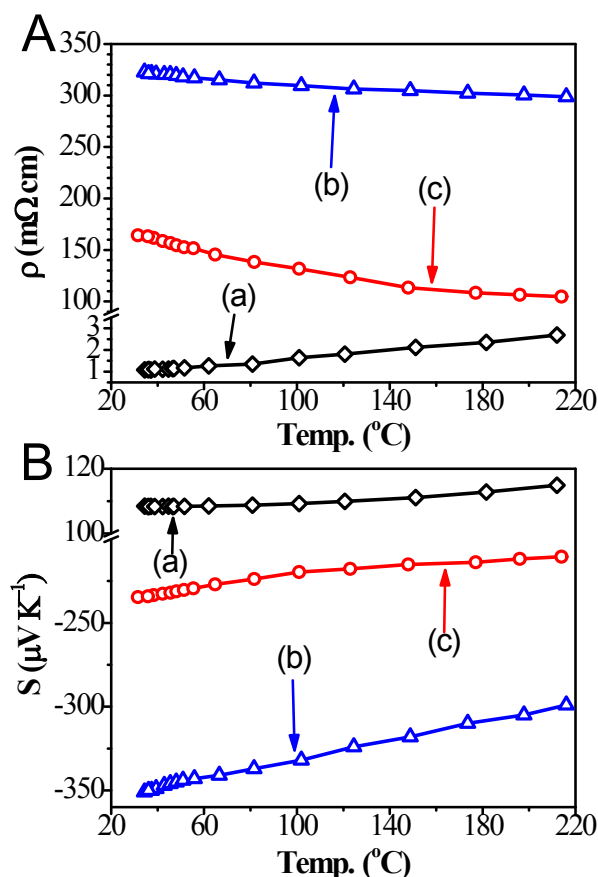

**Fig. S1** Temperature dependence of (A) resistivity ( $\rho$ ) and (B) Seebeck coefficient ( $S$ ) of (a)  $\text{NaCo}_2\text{O}_4$ , (b)  $\text{TiO}_2$  and (c)  $\text{TiO}_2\text{-NaCo}_2\text{O}_4$  composite materials.

## 2. Microstructure of the composite photoanode film

In order to investigate the effect of  $\text{TiO}_2\text{-NaCo}_2\text{O}_4$  composite nanocables on the photovoltaic properties of solar cells, different contents of the prepared CNC powders were mixed with  $\text{TiO}_2$  nanoparticles for hybrid pastes, and then the composite photoanode films were prepared by doctor-blade coating technique. The cross-sectional SEM image of the composite photoanode film with 10 wt% CNCs is shown in Fig. S2. It is observed in the photoanode that some CNCs are randomly scattered in the  $\text{TiO}_2$  nanocrystalline particles with an average diameter of about 30 nm, and many  $\text{TiO}_2$  nanocrystals are attached on the surface of the CNCs, consistent with the expected

design as shown in Fig. 1a. The CNCs have a much bigger size and smaller specific surface area than the  $\text{TiO}_2$  nanocrystals, which is a possible factor to influence light scattering as well as the adsorption capacity of dye molecules.

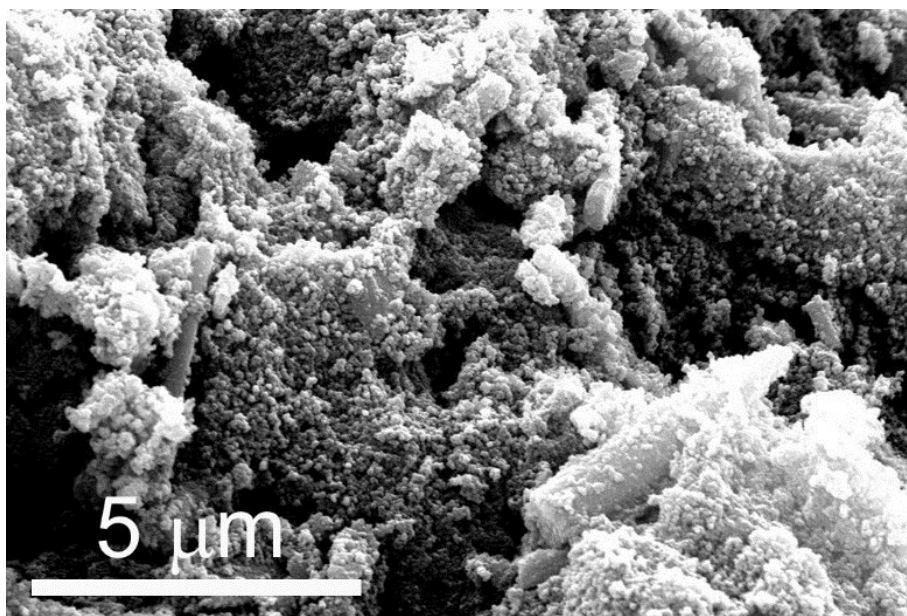

**Fig. S2** The cross-sectional SEM image of the composite photoanode film with 10 wt% CNCs.
